# Supplementary material for: Three-compartment, two-parameter concentration-driven model for uptake of excess atmospheric CO 2 by the global ocean
Source: Copernicus journal article supplement (doi:10.5194/bg-22-2979-2025), 2025-06-26
Supplement: Supplementary file 1 [file bg-22-2979-2025-supplement.zip]

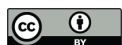

*Supplement of*

**Three-compartment, two-parameter concentration-driven model for up-take of excess atmospheric CO<sub>2</sub> by the global ocean**

**Stephen E. Schwartz**

*Correspondence to:* Stephen E. Schwartz (stephen.schwartz@stonybrook.edu)

- bg-22-2979-2025-supplement-title-page.pdf
- DataTablesREVISED2025-0605-0623.xls

The copyright of individual parts of the supplement might differ from the article licence.
